# Eight-Fold Increased COVID-19 Mortality in Autosomal Dominant Tubulointerstitial Kidney Disease due to *MUC1* Mutations: An Observational Study

## AUTHORS AND AFFILIATIONS

Kendrah O. Kidd, MS<sup>1, 2</sup>, Adrienne H. Williams, MA<sup>3</sup>, Abbigail Taylor, BS<sup>1</sup>, Lauren Martin, MSW<sup>1</sup>, Victoria Robins, RN, BSN<sup>1</sup>, John A. Sayer, MB, ChB, FRCP, PhD<sup>4,5,6</sup>, Eric Olinger, MD, PhD<sup>7</sup>, Holly R. Mabillard<sup>4</sup>, Gregory Papagregoriou, PhD<sup>8</sup>, Constantinos Deltas, PharmD<sup>8</sup>, Christoforos Stavrou, MD<sup>9</sup>, Peter J. Conlon, MD<sup>10, 11</sup>, Richard Edmund Hogan, MB<sup>10, 11</sup>, Elhussein A.E. Elhassan, MBSS<sup>10, 11</sup>, Drahomíra Springer, PhD<sup>12</sup>, Tomáš Zima, MD, <sup>12</sup>, Claudia Izzì, MD<sup>13</sup>, Alena Vrbacká, PhD<sup>2</sup>, Lenka Piherová, PhD<sup>2</sup>, Michal Pohludka, PhD<sup>14</sup>, Martin Radina, MS<sup>2</sup>, Petr Vylet'al, PhD<sup>2</sup>, Katerina Hodanova, PhD<sup>2</sup>, Martina Zivna, PhD<sup>1, 2</sup>, Stanislav Kmoch, PhD<sup>1,2,15</sup>, Anthony J. Bleyer, Sr., MD, MS<sup>1, 2</sup>

<sup>1</sup>Wake Forest School of Medicine, Section on Nephrology, Winston-Salem, NC, USA; <sup>2</sup>Research Unit of Rare Diseases, Department of Paediatrics and Inherited Metabolic Disorders, First Faculty of Medicine, Charles University, Prague, Czech Republic; <sup>3</sup>DNA Data Solutions, LLC, St. Petersburg, FL, USA;

<sup>4</sup>Translational and Clinical Research Institute, Faculty of Medical Sciences, Newcastle University, Newcastle upon Tyne, UK; <sup>5</sup>Renal Services, The Newcastle upon Tyne Hospitals NHS Foundation Trust, Newcastle upon Tyne, UK; <sup>6</sup>Newcastle Biomedical Research Centre, NIHR, Newcastle upon Tyne, UK;

<sup>7</sup>Center for Human Genetics, Cliniques universitaires Saint-Luc, Brussels, Belgium; <sup>8</sup>Molecular Medicine Research Center and Department of Biological Sciences, University of Cyprus, Nicosia, Cyprus;

<sup>9</sup>Department of Nephrology, Evangelismos Hospital, Paphos, Cyprus; <sup>10</sup>Department of Nephrology and transplantation Beaumont Hospital Dublin, Ireland; <sup>11</sup>Royal College of Surgeons in Ireland, Dublin, Ireland; <sup>12</sup>Institute of Medical Biochemistry and Laboratory Diagnostics, General University Hospital and the First Faculty of Medicine of Charles University, Prague, Czech Republic, <sup>13</sup>Clinical Genetics Unit,

University of Brescia and Spedali Civili, Brescia, Italy; <sup>14</sup>Genespector, Prague, Czech Republic; <sup>15</sup>Medirex Group Academy, Trnava, Slovakia

## **CORRESPONDING AUTHOR**

Anthony J. Bleyer, Sr., M.D., M.S.

Section on Nephrology

Wake Forest University School of Medicine

Medical Center Blvd.

Winston-Salem, NC 27157

E-mail: [ableyer@wakehealth.edu](mailto:ableyer@wakehealth.edu)

Phone: 336-414-1917

Fax: 336-716-4318

**Running title:** COVID-19 Mortality in ADTKD

**Word Count:** 3093

## **ABSTRACT**

### **Background**

*MUC1* and *UMOD* pathogenic variants cause autosomal dominant tubulointerstitial kidney disease (ADTKD). *MUC1* is expressed in kidney, nasal mucosa and respiratory tract, while *UMOD* is expressed only in kidney. Due to haplo-insufficiency ADTKD-*MUC1* patients produce approximately 50% of normal mucin-1.

### **Methods**

To determine whether decreased mucin-1 production was associated with an increased COVID-19 risk, we sent a survey to members of an ADTKD registry in September 2021, after the initial, severe wave of COVID-19. We linked results to previously obtained ADTKD genotype and plasma CA15-3 (mucin-1) levels and created a longitudinal registry of COVID-19 related deaths.

### **Results**

Surveys were emailed to 637 individuals, with responses from 89 ADTKD-*MUC1* and 132 ADTKD-*UMOD* individuals. 19/83 (23%) ADTKD-*MUC1* survey respondents reported a prior COVID-19 infection vs. 14/125 (11%) ADTKD-*UMOD* respondents (odds ratio (OR) 2.35 (95%CI 1.60-3.11,  $P = 0.0260$ ). Including additional familial cases reported from survey respondents, 10/41 (24%) ADTKD-*MUC1* individuals died of COVID-19 vs. 1/30 (3%) with ADTKD-*UMOD*, with OR 9.21 (95%CI 1.22-69.32),  $P = 0.03$ . The mean plasma mucin-1 level prior to infection in 14 infected and 27 uninfected ADTKD-*MUC1* individuals was  $7.06 \pm 4.12$  vs.  $10.21 \pm 4.02$  U/mL ( $P = 0.035$ ). Over three years duration, our longitudinal registry identified 19 COVID-19 deaths in 360 ADTKD-*MUC1* individuals (5%) vs. 3 deaths in 478 ADTKD-*UMOD* individuals (0.6%) ( $P = 0.0007$ ). Multivariate logistic regression revealed the following odds ratios (95% confidence interval) for COVID-19 deaths: ADTKD-*MUC1* 8.4 (2.9-29.5), kidney transplant 5.5 (1.6-9.1), body mass index ( $\text{kg}/\text{m}^2$ ) 1.1 (1.0-1.2), age (y) 1.04 (1.0-1.1).

## Conclusions

Individuals with ADTKD-*MUC1* are at an eight-fold increased risk of COVID-19 mortality vs. ADTKD-*UMOD* individuals. Haplo-insufficient production of mucin-1 may be responsible.

**KEY WORDS:** Autosomal Dominant Tubulointerstitial Kidney Disease; MUC1; UMOD; COVID-19; Mucin-1; CA15-3

## **INTRODUCTION**

Mucin-1 is a membrane-anchored glycoprotein that provides physical protection to the epithelial surface of many tissues<sup>1</sup> as well as performing other functions, including preventing infection,<sup>2</sup> mediating inflammation,<sup>3</sup> and modulating apoptosis.<sup>4</sup> In autosomal dominant tubulointerstitial kidney disease (ADTKD) due to heterozygous frameshift variants in the *MUC1* gene (ADTKD-*MUC1*) (OMIM 174000),<sup>5</sup> the wild-type allele synthesizes normal mucin-1, and the allele with the pathogenic *MUC1* variant produces a frameshift mucin-1 protein that deposits in the endoplasmic reticulum Golgi intermediate compartment (ERGIC).<sup>6</sup> While abnormal protein deposition occurs within all epithelial cells expressing mucin-1<sup>7</sup>, clinical sequelae of the disease were thought to be limited to the kidney, with no respiratory, gastrointestinal, or skin manifestations previously identified.<sup>8,9</sup> Affected individuals develop slowly progressive chronic kidney disease (CKD) that leads to kidney failure at a mean age of 45 years.<sup>8</sup> ADTKD-*UMOD* (OMIM 162000, 603860) is phenotypically similar and often clinically indistinguishable from ADTKD-*MUC1* (OMIM 17400).<sup>10</sup> Unlike mucin-1, uromodulin is expressed exclusively in the thick ascending limb of Henle.<sup>11</sup> The median age of kidney failure in ADTKD-*UMOD* is 49 years.<sup>12</sup> Both groups of individuals have excellent outcomes with kidney transplantation<sup>13</sup>, as the diseases do not recur in the transplanted kidneys and individuals usually have few other comorbid conditions.

Mucin-1 has been implicated as a protective factor in COVID-19, though this relationship has not been firmly established in human studies. Mucin-1 is produced in both the nares and the lungs, primary sites of COVID-19 infection.<sup>14,15</sup> Mucin-1 in breast milk has been shown to inhibit SARS-CoV-2 infection<sup>16</sup>. In *in vitro* studies, mucin-1 was highly expressed on the surface of ACE2-positive respiratory epithelial cells, and the glycosylated extracellular domain of mucin-1 restricted SARS-CoV-2 binding and entry<sup>17</sup>.

Patients with ADTKD-*MUC1* may be at increased risk of COVID-19 due to haploinsufficiency of mucin-1. In ADTKD-*MUC1*, there is one wild-type allele that produces mucin-1 and one mutated allele

that produces a truncated version of mucin-1 that deposits intracellularly and does not function as a normal mucin-1 protein. In a recent investigation, the mean plasma CA15-3 level, which measures mucin-1 levels with an immunoassay using the DF3 antibody,<sup>18</sup> was  $8.6 \pm 4.3$  U/mL in individuals with ADTKD-*MUC1* vs.  $14.6 \pm 5.6$  U/mL in controls ( $P < 0.001$ ).<sup>19</sup> The mucin-1 content of plasma is derived primarily from the lungs.<sup>20</sup> Thus, ADTKD-*MUC1* patients produce less mucin-1, which may protect against COVID-19.

To determine if individuals with ADTKD-*MUC1* were at increased risk of COVID-19, we decided to compare the rates of COVID-19 infections between patients with ADTKD-*MUC1* and patients with ADTKD-*UMOD* in the Wake Forest Rare Inherited Kidney Disease registry. The registry attempts to recruit all individuals with ADTKD-*UMOD* and ADTKD-*MUC1* and includes 360 adults from 119 families affected with ADTKD-*MUC1* and 478 individuals from 171 families affected with ADTKD-*UMOD*. The registry has grown over the last two decades, with approximately 25% of individuals making contact with the Wake Forest Rare Inherited Kidney Disease Team independently without physician referral.<sup>21</sup> The registry keeps in contact with family members through webinars, in-person meetings, email, and a private Facebook® support page. Thus, there is a large registry containing individuals with ADTKD-*MUC1* and ADTKD-*UMOD*, without any perceived bias in interactions based on ADTKD type. The two diseases have a bland urinary sediment, slowly progressive chronic kidney disease leading to kidney failure at a mean age of approximately 45 years, and the absence of non-renal clinical manifestations.

To determine if individuals with ADTKD-*MUC1* were at increased risk of COVID-19, we first conducted a systematic survey of individuals with these two conditions in September 2021 (see **Figure 1**), with a specific goal of avoiding any ascertainment bias between the ADTKD-*UMOD* and ADTKD-*MUC1* groups. At that time, most individuals had had the opportunity to obtain COVID-19 vaccination, and the worst wave of COVID-19 deaths in the US had occurred. We informed patients in our registry of our

interest in COVID-19 deaths in ADTKD-*UMOD* and ADTKD-*MUC1* patients and began tracking these occurrences.

## **MATERIALS AND METHODS**

This study was approved by the Wake Forest Institutional Review Board (IRB00000352, Sub-study: COVID-19 Effects in Inherited Kidney Disease, approved September 8, 2021). We developed a survey and distributed it electronically to all individuals with ADTKD within our registry (see **Figure 1** and **Supplementary Material**). Survey data were collected between September 24, 2021 and November 1, 2021 and managed using REDCap electronic data capture tools hosted at Wake Forest School of Medicine. REDCap is a secure, web-based, National Institutes of Health (NIH)–sponsored application<sup>22</sup> that supports confidential data capture for research studies. Information collected included: COVID-19 vaccination type and number of vaccines administered; COVID-19 infection characteristics including the date of first clinical symptoms, need for hospitalization, need for intensive care unit admission, and death or recovery from infection. Survey respondents provided information about their personal COVID-19 infections as well as those of family members, as family members may have died or become too sick to respond to our survey. For reported COVID-19 deaths, we spoke personally with family members to ascertain that the death was related to COVID-19. Data from the survey respondents were linked to other data in our registry that had been obtained prior to COVID-19 infections. This data included the ADTKD mutation (*UMOD* vs. *MUC1*) and plasma CA15-3 (mucin-1) levels. CA15-3 levels were measured as previously reported.<sup>19</sup>

We continued to ascertain COVID-19 deaths in our survey. In January 2023, an additional survey was sent to individuals with ADTKD that requested information about COVID-19 deaths. In August 2023, we reviewed all family trees of ADTKD-*UMOD* and ADTKD-*MUC1* families to identify new deaths by searching each name on-line for potential obituaries and then contacting family members about causes

of death. We then performed a case-control study with cases including adults affected with ADTKD-*UMOD* and ADTKD-*MUC1* who died of COVID-19 and controls including adults affected with ADTKD-*UMOD* and ADTKD-*MUC1* who did not die from COVID-19.

**Statistical analysis:** Survey questions were summarized with the addition of descriptive statistics and additional descriptive data were added from registry data when available. Associations were assessed using a generalized estimating equation to account for the family structure. We assumed exchangeable correlation within family and computed a robust sandwich estimator of variance.<sup>23</sup> A compound-symmetry covariance structure was used to account for the correlation between family members for continuous outcomes.

**Genotyping:** Individuals were genotyped for *UMOD* pathogenic variants using standard genetic techniques.<sup>12</sup> For *MUC1* sequencing, a CLIA-approved mass spectrometry-based assay was performed the Broad Institute of MIT and Harvard, Cambridge, MA<sup>24</sup> or Illumina and/or PacBio® sequencing of *MUC1* PCR amplicon was performed by the Kmoch laboratory, First Faculty of Medicine, Prague, Czech Republic.<sup>7</sup>

## **RESULTS**

The initial survey was emailed to 637 individuals (see **Figure 2a**), including 256 patients with ADTKD-*MUC1* and 381 patients with ADTKD-*UMOD*. There were 257 respondents (35% response rate). The response rate for individuals with ADTKD-*MUC1* was 89/256(35%), and the response rate for individuals with ADTKD-*UMOD* was 132/381(35%). Compared to non-respondents, respondents were more likely to be White (97% vs. 90%,  $P = 0.02$ ) and older ( $50.2 \pm 15.2$  years vs.  $47.0 \pm 16.0$  years,  $P = 0.02$ ) (see **Supplementary Table S1**). Of the respondents, six individuals with ADTKD-*MUC1* and seven with ADTKD-*UMOD* did not complete the survey about personal COVID-19 infection and were removed. Clinical characteristics were similar between the remaining 83 respondents with ADTKD-*MUC1* and 125



individuals with ADTKD-*UMOD* (see **Supplementary Table S2**). The respondents provided information on an additional 16 family members with ADTKD-*MUC1*, resulting in 105 individuals with ADTKD-*MUC1* and an additional nine family members with ADTKD-*UMOD*, resulting in 141 individuals (see **Figure 2a**).

### **COVID-19 Outcomes During the Early Phase of the Pandemic**

We compared COVID-19 outcomes in survey respondents with ADTKD-*MUC1* vs. ADTKD-*UMOD* in Sep 2021, after the Delta variant had peaked in the US (see **Figure 2a**). Of 83 ADTKD-*MUC1* individuals, 19 (22%) developed COVID-19 infection vs. 14/125 (11%) of ADTKD-*UMOD* individuals (odds ratio (OR) 2.35 (95%CI 1.60-3.11,  $P = 0.026$ ). **Table 1** shows a comparison of the individuals who developed COVID-19 by disease type. There was no statistical difference between individuals with regards to age, gender, or body mass index, though numbers were small in each group. At the time of COVID-19 infection, 16% of ADTKD-*MUC1* and 21% of ADTKD-*UMOD* individuals were unvaccinated. ADTKD-*MUC1* individuals who did not develop COVID-19 were more likely to be vaccinated, but this is likely related to bias, as ADTKD-*MUC1* individuals who developed COVID-19 may have developed it several months prior to the survey and often did so before the vaccine was available, while individuals who did not develop COVID-19 could have received the vaccine up until the time of the survey. As stated above, in a univariate model the odds ratio for developing COVID-19 infection was 2.35 for ADTKD-*MUC1* vs. ADTKD-*UMOD*. Kidney transplantation status, body mass index, age, and gender were not significant in univariate models or when added to ADTKD type in a multivariate model.

At this stage of the analysis, we started to include data that respondents had provided regarding affected family members with COVID-19 (see **Figure 2a**), including 16 individuals with ADTKD-*MUC1* and nine individuals with ADTKD-*UMOD*, all of whom were previously in our registry. Of the total number of cases of COVID-19 identified, 10/41 (24%) of ADTKD-*MUC1* COVID-19 individuals died vs. 1/30 (3%) ADTKD *UMOD* COVID-19 individuals. Using a generalized estimating equation to account for the family

structure, we found an odds ratio of mortality in ADTKD-*MUC1* vs. ADTKD-*UMOD* of 9.21, 95% CI 1.22-69.32,  $P = 0.03$ .

Thus, in the early and more virulent phase of the COVID-19 epidemic, patients with ADTKD-*MUC1* were more likely to develop COVID-19 and were much more likely to die from COVID-19 compared to patients with ADTKD-*UMOD*.

### **International Assessment of Mortality in COVID-19 According to ADTKD Type**

We then queried collaborators (CS, JAS, PJC, LR) from three other academic centers in November 2021 and found 3/24 (13%) deaths in individuals with ADTKD-*MUC1* who developed COVID-19 vs. 0 deaths in 11 individuals with ADTKD-*UMOD* who developed COVID-19. Six of the 24 individuals with ADTKD-*MUC1* were kidney transplanted vs 4/11 in the ADTKD-*UMOD* group. The mean age of the ADTKD-*MUC1* group was  $50.8 \pm 14.4$  years vs.  $53.7 \pm 12.3$  years in the ADTKD-*UMOD* group.

### **Plasma Mucin-1 Levels in ADTKD-*MUC1* in Infected vs. Uninfected ADTKD-*MUC1* Patients.**

To determine whether the increased infection rate was associated with decreased mucin-1 production, we compared plasma CA15-3 (mucin-1) levels obtained as part of a prior study<sup>19</sup> on many of the survey individuals. The mean CA15-3 level for 14 COVID-19 infected ADTKD-*MUC1* individuals was  $7.06 \pm 4.12$  U/mL vs.  $10.21 \pm 4.02$  U/mL for 27 uninfected ADTKD-*MUC1* individuals ( $P = 0.035$ ). For 11 COVID-19 infected ADTKD-*UMOD* individuals, the mean CA15-3 level was  $14.18 \pm 2.35$  U/mL vs  $13.28 \pm 5.53$  U/mL for 49 uninfected individuals ( $P = 0.60$ ).

### **Observational Cohort Study of COVID-19 Deaths in ADTKD-*MUC1***

We then continued an observational cohort study of COVID-19 deaths (see **Figure 1, Figure 2b**). **Table 2** shows the characteristics of adults in our registry according to ADTKD type. 19/360 (5%) individuals with ADTKD-*MUC1* died from COVID-19 vs. 3/478 (0.6%) individuals with ADTKD-*UMOD* ( $P = 0.0007$ ). The 19

deaths in ADTKD-*MUC1* individuals occurred in 16 families. The three deaths in ADTKD-*UMOD* individuals occurred in three families. **Table 3** shows the characteristics of patients who died of COVID-19 according to ADTKD type. Univariate and multivariate logistic models were then created with death from COVID-19 as the binary outcome (see **Table 4**). Patients with ADTKD-*MUC1* had an eight-fold increased risk of death (8.4 (29-29.5%,  $P = 0.009$ )) vs. ADTKD-*UMOD* after adjustment for body mass index, kidney transplant status, and age. Of the patients with ADTKD-*MUC1* who died (see **Supplemental Table S3**), 84% had undergone kidney transplant vs. 53% in ADTKD-*MUC1* patients who had not died ( $P = 0.008$ ). 43% of the ADTKD-*MUC1* patients who died had reached KF > 10 years prior to death vs. 26% of ADTKD-*MUC1* patients in our registry who did not die of ADTKD-*MUC1* ( $P = 0.001$ ). **Table S3** shows a comparison of characteristics for patients with ADTKD-*MUC1* who died vs. those who did not.

## **DISCUSSION**

This investigation found that patients with ADTKD-*MUC1* are at a markedly increased risk of death from COVID-19, with 5% of adult ADTKD-*MUC1* patients dying of COVID-19 during the three years of the pandemic vs. 0.6% of ADTKD-*UMOD* adults ( $P = 0.0007$ ). Most, but not all, of the deaths occurred in patients who had undergone kidney transplantation, though the death rate was not similarly high in transplanted patients with ADTKD-*UMOD*. Patients died of respiratory complications, and many had prolonged hospitalizations. While most of the deaths occurred early in the pandemic, deaths have continued to occur.

While patient numbers were small due to the rarity of ADTKD, we showed consistent results with several different analyses: (1) We identified a 2.35 (95% confidence interval 1.60-3.11) increased odds of COVID-19 infection in ADTKD-*MUC1* individuals early in the pandemic, with 23% of ADTKD-*MUC1* individuals developing COVID-19 vs. 11% of ADTKD-*UMOD* individuals ( $P = 0.026$ ). (2) There was

an early increased risk of death, with 24% of individuals with ADTKD-*MUC1* dying from COVID-19 vs. 3% in individuals with ADTKD-*UMOD* ( $P = 0.03$ ). (3) We found that the mean steady state CA15-3 level at least 30 days prior to COVID-19 infection<sup>19</sup> for 14 COVID-19 infected ADTKD-*MUC1* individuals was  $7.06 \pm 4.12$  U/mL vs.  $10.21 \pm 4.02$  U/mL for 27 uninfected individuals ( $P = 0.035$ ). (4) Our longitudinal study then revealed an 8-fold risk of death from COVID-19 in patients with ADTKD-*MUC1* vs. ADTKD-*UMOD* ( $P = 0.0009$ ). Thus, compared to ADTKD-*UMOD* individuals, ADTKD-*MUC1* individuals had a higher COVID-19 infection rate and were more likely to die of COVID-19. ADTKD-*MUC1* individuals were more likely to contract COVID-19 if their plasma CA15-3 levels were low.

In the early stages of COVID-19, eight (36%) of twenty-two ADTKD-*MUC1* kidney transplanted patients died, compared to one (25%) of four ADTKD-*UMOD* kidney transplanted patients. In a meta-analysis of COVID-19 outcomes in patients with kidney transplants during the Delta strain of SARS-CoV-2<sup>25</sup>, the mortality rate was approximately 21%. While it is difficult to compare patient characteristics between studies, ADTKD-*MUC1* patients are in general quite healthy with no comorbidities except kidney disease. For example, in the meta-analysis<sup>25</sup>, there was an approximate 10% prevalence of diabetes and 8% prevalence of cardiovascular disease.

There were several weaknesses in our study. Most importantly, the sample size was small. Fortunately, we have the largest registry of ADTKD, with over 280 families and 800 individuals, and the response rate to our survey was good. However, by definition, any study of rare diseases will be associated with a small patient population. Another potential weakness was ascertainment and selection bias. We attempted to eliminate as many sources of bias as possible. Our registry has been historically designed to study all individuals with ADTKD-*UMOD* and ADTKD-*MUC1* in a similar manner. The surveys were sent out in an un-biased fashion, and the characteristics of respondents was similar for ADTKD-*UMOD* and ADTKD-*MUC1*. However, there could be unanticipated forms of bias that we did not

identify. Another weakness of our study is that we did not examine the prevalence of other respiratory infections according to disease type. We plan to do this in the future.

The results of our investigation provide unique clinical information regarding the role of mucin-1 in COVID-19 infection. Our investigation shows that *ADTKD-MUC1* individuals are at increased risk from COVID-19, based on lower mucin-1 levels prior to infection. There is emerging information that mucin-1 in the nares and lungs serves as an initial protective barrier against infection. Lai et al. showed that mucin-1 inhibited SARS-CoV-2 viral attachment, entry, and post-entry replication.<sup>16</sup> Biering et al. performed genome-wide bidirectional CRISPR screens to define host-pathogen interactions required for facilitating or restricting SARS-CoV-2 in a human lung cell line and identified mucin-1 as an important host defense factor.<sup>14</sup> The investigators then showed an antiviral role for membrane-anchored mucins (including mucin-1) *in vitro* and in mouse models of SARS-CoV-2 infection. Membrane-bound mucins specifically inhibited spike-mediated viral entry into lung cells. Chatterjee et al. showed that mucin-1 is highly expressed on the ACE2-positive respiratory epithelial cells, and that removal of the mucin domains enhances spike binding<sup>17</sup>. Our investigation provides complementary evidence in humans. Patients with *ADTKD-MUC1* have mutations that prevent expression of the mucin domain, and these patients are at markedly increased risk of infection and death from COVID-19.

While there is evidence that decreased production of mucin-1 is associated with an increased risk from COVID-19, there is also evidence that increased production of mucin-1 may be harmful. Mucin-1 participates in the cytokine storm that occurs with COVID-19 and leads to an inflammatory response that is highly damaging. In studies of individuals who do not have *ADTKD-MUC1*, elevated mucin-1 content of bronchoalveolar fluid<sup>26</sup>, airway mucus<sup>27</sup>, and blood<sup>28-31</sup> at the time of infection is associated with worse and more severe COVID-19 outcomes. A recent genome-wide association study<sup>32</sup> identified the rs41264915 intronic variant *THBS3* (associated with increased mucin-1 expression) as being associated with critical COVID-19. Another GWAS study suggested that increased mucin-1

expression is associated with more severe COVID-19, while other GWAS studies have not found this association.<sup>33</sup> Thus, lowering mucin-1 production during infection has been postulated as a potential therapy for COVID-19<sup>34</sup>.

Compounds increasing mucin-1 production could be prophylactic for individuals with low mucin-1 levels, whereas compounds reducing mucin-1 production could be therapeutic during acute infection. The finding that both pathologically low and elevated clinical characteristics are associated with increased mortality is well known and has also been noted with body mass index<sup>35</sup>, sleep time<sup>36</sup>, and many laboratory parameters<sup>37</sup>.

Given the increased risk associated with ADTKD-*MUC1* individuals from COVID-19, it would be prudent for families with an unknown cause of ADTKD (chronic kidney disease, autosomal dominant transmission, bland urinary sediment) to be tested for a *MUC1* mutation. Unfortunately, genotyping for the vast majority of *MUC1* mutations is currently not performed in any commercial genetics laboratory, as these mutations are not identified by standard Sanger sequencing.<sup>38</sup> Mucin-1 plays an important role in other respiratory tract infections<sup>14</sup>, and we need to extend our studies in patients with ADTKD-*MUC1* to other pulmonary infections.

In summary, this investigation shows that individuals with ADTKD-*MUC1* are at increased risk of COVID-19 infection and mortality, especially for immunosuppressed and kidney transplanted patients exposed to more virulent COVID-19 variants. ADTKD-*MUC1* patients with low plasma mucin-1 levels may be especially at increased risk. We believe that clinicians should consider more aggressive preventive care and treatment for COVID-19 in patients with ADTKD-*MUC1*.

## **DISCLOSURES**

This work was supported by NIH-NIDDKU01 DK-103225. AJB has also received funding from the Black Brogan Foundation, The Slim Health Foundation, Soli Deo Gloria. He has received compensation as follows: advisory board, Horizon Pharma; speaker, Natera; author, UpToDate; advisor, First Faculty of

Medicine, Charles University; royalty; Sail Bio; patent for *UMOD* genetic diagnosis. PJC has received funding from Astra Zeneca, Boehringer, Hansa, and medical advisory board fees. KOK, AHW, AT, AK, LM, VR, APR-C, JAS, EO, HRM, GP, CD, CS, REH, EE, DS, CI, AV, LP, TZ, MP, MR, PV, KH, MZ, and SK have nothing to disclose.

## **DATA SHARING**

We are very happy to work with any groups interested in studying this condition and providing genetic information that can satisfy their research requests and protect patient confidentiality. An anonymized dataset analyzed in the study will be available from the European Genome-Phenome Archive (EGA-archive.org), with request of data access.

## **ACKNOWLEDGEMENTS**

SK and colleagues were supported by the OP Integrated Infrastructure, the project: Research on COVID-19 progressive diagnostic methods and biomarkers useful in early detection of individuals at increased risk of severe disease, ITMS: 313011ATA2, co-financed by the European Regional Development Fund and by the Slovak Research and Development Agency under the Contract no. PP-COVID-20-0056, by the Ministry of Health of the Czech Republic (grants NU21-07-00033, NU22-A-123), the Ministry of Education of the Czech Republic (grant LTAUSA19068) and by institutional programs of Charles University in Prague (UNCE/MED/007). JAS and HRM are funded by the Medical Research Council. The National Center for Medical Genomics (LM2023067) kindly provided sequencing and genotyping. AJB was funded by NIH-NIDDK R21 DK106584, CKD Biomarkers Consortium Pilot and Feasibility Studies Program funded by the NIH-NIDDK (U01 DK103225), the Slim Health Foundation, the Black-Brogan Foundation, Soli Deo Gloria. EE reports funds from the Royal College of Surgeons in Ireland StAR PhD. CD received funding from The Slim Health Foundation and the European Union's Horizon 2020 Program, the Government of Cyprus and the University of Cyprus, under grant agreement number 857122. The authors thank all participating patients and families who participated in this study.

## **CONTRIBUTORS**

Conceptualization: AJB; Data curation: KOK, AT, CS, GP, HRM, REH; Formal analysis: AJB, KOK, AHW;  
 Funding acquisition: AJB, SK; Investigation: KOK, AT, LM, VR, APR-C, JAS, EO, HRM, GP, CD, CS, PJC, REH,  
 EE, PV, KH, MZ; Methodology: AJB, KOK, DS, AV, LP, PV, KH, MZ, SK; Project Administration: KOK, AT;  
 Resources: KOK, AHW, AT, LM, VR, JAS, EO, HRM, GP, CD, CS, PJC, REH, EE, CI, MP, MR, PV, KH, MZ, SK,  
 AJB; Software: KOK, AHW, AT; Supervision: AJB, SK, TZ, CS, PJC, JAS; Validation: KOK, AHW; Visualization:  
 KOK, AHW; Writing-original draft: AJB, KOK, AHW; Writing-review & editing: KOK, AHW, AT, LM, VR, JAS,  
 EO, HRM, GP, CD, CS, PJC, REH, EE, CI, PV, KH, MZ, SK, and AJB.

### **LIST OF SUPPLEMENTARY MATERIALS**

**Supplementary Table S1.**

**Supplementary Table S2.**

**Supplementary Table S3.**

**Supplementary Survey.**



## **REFERENCES**

1. Apostolopoulos V, Stojanovska L, Gargosky SE. MUC1 (CD227): a multi-tasked molecule. *Cell Mol Life Sci.* 12/2015 2015;72(23):4475-4500. Not in File. doi:10.1007/s00018-015-2014-z [doi];10.1007/s00018-015-2014-z [pii]
2. Verceles AC, Bhat P, Nagaria Z, et al. MUC1 ectodomain is a flagellin-targeting decoy receptor and biomarker operative during *Pseudomonas aeruginosa* lung infection. *Sci Rep.* Nov 22 2021;11(1):22725. doi:10.1038/s41598-021-02242-x
3. Ballester B, Milara J, Cortijo J. The role of mucin 1 in respiratory diseases. *Eur Respir Rev.* Mar 31 2021;30(159)doi:10.1183/16000617.0149-2020
4. Supruniuk K, Radziejewska I. MUC1 is an oncoprotein with a significant role in apoptosis (Review). *Int J Oncol.* Sep 2021;59(3)doi:10.3892/ijo.2021.5248
5. Kirby A, Gnirke A, Jaffe DB, et al. Mutations causing medullary cystic kidney disease type 1 lie in a large VNTR in MUC1 missed by massively parallel sequencing. *Nat Genet.* 2/10/2013 2013;45:288-393. Not in File.
6. Dvela-Levitt M, Kost-Alimova M, Emani M, et al. Small Molecule Targets TMED9 and Promotes Lysosomal Degradation to Reverse Proteinopathy. *Cell.* 2019 2019;178(3):521-535.e23. doi:<https://doi.org/10.1016/j.cell.2019.07.002>
7. Zivna M, Kidd K, Pristoupilova A, et al. Noninvasive Immunohistochemical Diagnosis and Novel MUC1 Mutations Causing Autosomal Dominant Tubulointerstitial Kidney Disease. *J Am Soc Nephrol.* 7/2/2018 2018;Not in File. doi:ASN.2018020180 [pii];10.1681/ASN.2018020180 [doi]
8. Bleyer AJ, Kmoch S, Antignac C, et al. Variable clinical presentation of an MUC1 mutation causing medullary cystic kidney disease type 1. *Clin J Am Soc Nephrol.* 3/2014 2014;9(3):527-535. Not in File. doi:CJN.06380613 [pii];10.2215/CJN.06380613 [doi]

9. Devuyst O, Olinger E, Weber S, et al. Autosomal dominant tubulointerstitial kidney disease. *Nat Rev Dis Primers*. Sep 5 2019;5(1):60. doi:10.1038/s41572-019-0109-9
10. Olinger E, Hofmann P, Kidd K, et al. Clinical and genetic spectra of autosomal dominant tubulointerstitial kidney disease due to mutations in UMOD and MUC1. *Kidney Int*. May 22 2020;doi:10.1016/j.kint.2020.04.038
11. Rampoldi L, Scolari F, Amoroso A, Ghiggeri G, Devuyst O. The rediscovery of uromodulin (Tamm-Horsfall protein): from tubulointerstitial nephropathy to chronic kidney disease. *Kidney Int*. 8/2011 2011;80(4):338-347. Not in File. doi:ki2011134 [pii];10.1038/ki.2011.134 [doi]
12. Kidd K, Vylet'al P, Schaeffer C, et al. Genetic and Clinical Predictors of Age of ESKD in Individuals With Autosomal Dominant Tubulointerstitial Kidney Disease Due to UMOD Mutations. *Kidney Int Rep*. Sep 2020;5(9):1472-1485. doi:10.1016/j.ekir.2020.06.029
13. Cormican S, Kennedy C, Connaughton DM, et al. Renal transplant outcomes in patients with autosomal dominant tubulointerstitial kidney disease. *Clin Transplant*. Feb 2020;34(2):e13783. doi:10.1111/ctr.13783
14. Biering SB, Sarnik SA, Wang E, et al. Genome-wide bidirectional CRISPR screens identify mucins as host factors modulating SARS-CoV-2 infection. *Nat Genet*. Jul 25 2022;doi:10.1038/s41588-022-01131-x
15. Sungnak W, Huang N, Becavin C, et al. SARS-CoV-2 entry factors are highly expressed in nasal epithelial cells together with innate immune genes. *Nat Med*. May 2020;26(5):681-687. doi:10.1038/s41591-020-0868-6
16. Lai X, Yu Y, Xian W, et al. Identified human breast milk compositions effectively inhibit SARS-CoV-2 and variants infection and replication. *iScience*. Apr 15 2022;25(4):104136. doi:10.1016/j.isci.2022.104136

17. Chatterjee M HL, Mykityn AZ, Wang C, Lamers MM, Westendorp B, Wubbolts RW, van Putten JPM, Bosch BJ, Haagsmans BL, Strijbis K. Glycosylated extracellular mucin domains protect against SARS-CoV-2 infection at the respiratory surface. *PLoS Pathog.* 2023;19(8)doi:10.1371/journal.ppat.1011571
18. Klee GG, Schreiber WE. MUC1 gene-derived glycoprotein assays for monitoring breast cancer (CA 15-3, CA 27.29, BR): are they measuring the same antigen? *Arch Pathol Lab Med.* Oct 2004;128(10):1131-5. doi:10.1043/1543-2165(2004)128<1131:MGGAFM>2.0.CO;2
19. Vylet'al P, Kidd K, Ainsworth HC, et al. Plasma Mucin-1 (CA15-3) Levels in Autosomal Dominant Tubulointerstitial Kidney Disease due to MUC1 Mutations. *Am J Nephrol.* 2021;52(5):378-387. doi:10.1159/000515810
20. Sakuma T, Takahashi K, Ohya N, Usuda K, Handa M. Serum KL-6, a novel mucin-like glycoprotein, as an indicator of interstitial pneumonitis following lobectomy. *Surg Today.* 1999;29(2):121-8. doi:10.1007/BF02482236
21. Bleyer AJ, Kidd K, Robins V, et al. Outcomes of patient self-referral for the diagnosis of several rare inherited kidney diseases. *Genet Med.* Jul 24 2019;doi:10.1038/s41436-019-0617-8
22. Harris PA, Taylor R, Thielke R, Payne J, Gonzalez N, Conde JG. Research electronic data capture (REDCap)--a metadata-driven methodology and workflow process for providing translational research informatics support. *J Biomed Inform.* 4/2009 2009;42(2):377-381. Not in File. doi:S1532-0464(08)00122-6 [pii];10.1016/j.jbi.2008.08.010 [doi]
23. Zeger SL, Liang KY, Albert PS. Models for longitudinal data: a generalized estimating equation approach. *Biometrics.* Dec 1988;44(4):1049-60.
24. Blumenstiel B, Defelice M, Birsoy O, et al. Development and Validation of a Mass Spectrometry-Based Assay for the Molecular Diagnosis of Mucin-1 Kidney Disease. *J Mol Diagn.* 7/2016 2016;18(4):566-571. Not in File. doi:S1525-1578(16)30020-4 [pii];10.1016/j.jmoldx.2016.03.003 [doi]

25. Jayant K, Reccia I, Bachul PJ, et al. The Impact of COVID-19 on Kidney Transplant Recipients in Pre-Vaccination and Delta Strain Era: A Systematic Review and Meta-Analysis. *J Clin Med*. Sep 30 2021;10(19)doi:10.3390/jcm10194533
26. Wu D, Yang XO. Dysregulation of Pulmonary Responses in Severe COVID-19. *Viruses*. May 21 2021;13(6)doi:10.3390/v13060957
27. Lu W, Liu X, Wang T, et al. Elevated MUC1 and MUC5AC mucin protein levels in airway mucus of critical ill COVID-19 patients. *J Med Virol*. Feb 2021;93(2):582-584. doi:10.1002/jmv.26406
28. Arnold DT, Donald C, Lyon M, et al. Krebs von den Lungen 6 (KL-6) as a marker for disease severity and persistent radiological abnormalities following COVID-19 infection at 12 weeks. *PLoS One*. 2021;16(4):e0249607. doi:10.1371/journal.pone.0249607
29. d'Alessandro M, Bergantini L, Cameli P, et al. Serial KL-6 measurements in COVID-19 patients. *Intern Emerg Med*. Sep 2021;16(6):1541-1545. doi:10.1007/s11739-020-02614-7
30. d'Alessandro M, Cameli P, Bergantini L, Franchi F, Scolletta S, Bargagli E. Serum concentrations of Krebs von den Lungen-6 in different COVID-19 phenotypes. *J Med Virol*. Aug 14 2020;doi:10.1002/jmv.26431
31. Deng K, Fan Q, Yang Y, et al. Prognostic roles of KL-6 in disease severity and lung injury in COVID-19 patients: A longitudinal retrospective analysis. *J Med Virol*. Apr 2021;93(4):2505-2512. doi:10.1002/jmv.26793
32. Kousathanas A, Pairo-Castineira E, Rawlik K, et al. Whole genome sequencing reveals host factors underlying critical Covid-19. *Nature*. Mar 7 2022;doi:10.1038/s41586-022-04576-6
33. Initiative C-HG. Mapping the human genetic architecture of COVID-19. *Nature*. Dec 2021;600(7889):472-477. doi:10.1038/s41586-021-03767-x

34. Alimova M, Sidhom EH, Satyam A, et al. A High Content Screen for Mucin-1-Reducing Compounds Identifies Fostamatinib as a Candidate for Rapid Repurposing for Acute Lung Injury during the COVID-19 pandemic. *bioRxiv*. Jun 30 2020;doi:10.1101/2020.06.30.180380
35. Yoo HJ. Body Mass Index and Mortality. *J Obes Metab Syndr*. Mar 2017;26(1):3-9. doi:10.7570/jomes.2017.26.1.3
36. Hossin MZ. From habitual sleep hours to morbidity and mortality: existing evidence, potential mechanisms, and future agenda. *Sleep Health*. Jun 2016;2(2):146-153. doi:10.1016/j.sleh.2016.01.006
37. Seay NW, Lehrich RW, Greenberg A. Diagnosis and Management of Disorders of Body Tonicity-Hyponatremia and Hypernatremia: Core Curriculum 2020. *Am J Kidney Dis*. Feb 2020;75(2):272-286. doi:10.1053/j.ajkd.2019.07.014
38. Zivna M, Kidd KO, Baresova V, Hulkova H, Kmoch S, Bleyer AJ, Sr. Autosomal dominant tubulointerstitial kidney disease: A review. *Am J Med Genet C Semin Med Genet*. Sep 2022;190(3):309-324. doi:10.1002/ajmg.c.32008

## **FIGURE LEGENDS**

Figure 1. Study timeline and COVID-19 related deaths in ADTKD patients.

Figure 2. Flow diagram for the study. A) Initial ADTKD Registry COVID-19 Survey. B) Cohort study reviewing the ADTKD registry for COVID-19 related deaths.

Table 1. Characteristics of individuals developing COVID-19 by disease type.

|                                                                                        | <b>ADTKD-MUC1</b>   |                    |                 | <b>ADTKD-UMOD</b>  |                    |                   |
|----------------------------------------------------------------------------------------|---------------------|--------------------|-----------------|--------------------|--------------------|-------------------|
| COVID-19 infection                                                                     | Yes                 | No                 | <i>P</i> -value | Yes                | No                 | <i>P</i> -value   |
| Individuals (n(%)) <sup>a</sup>                                                        | 19 (22%)            | 64 (88%)           | --              | 14 (11%)           | 111 (89%)          | --                |
| Gender (n male (%))                                                                    | 11(58%)             | 24 (38%)           | 0.079           | 2 (14%)            | 44 (40%)           | 0.063             |
| Age, years (mean ± sd (median))                                                        | 49.6 ± 19.9 (50.6)  | 51.6 ± 16.8 (55.6) | 0.63            | 47.0 ± 13.3 (49.5) | 51.6 ± 14.0 (52.8) | 0.14              |
| Age > 60 (n (%))                                                                       | 6 (32%)             | 22 (34%)           | 0.99            | 1 (7%)             | 37 (33%)           | 0.029             |
| Body mass index, kg/m <sup>2</sup> (mean ± sd (median))                                | 25.5 ± 5.6 (24)     | 25.1 ± 5.0 (24.5)  | 0.76            | 24.9 ± 4.5 (24.5)  | 25.9 ± 5.1 (25)    | 0.47              |
| eGFR <sup>b</sup> (mean ± sd (median)) for pre-kidney failure, non-kidney transplanted | 49.7 ± 32.5 (42.6)  | 49.4 ± 37.5 (37.6) | 0.98            | 43.9 ± 22.4 (37.5) | 46.2 ± 29.8 (41.7) | 0.77              |
| eGFR > 60 ml/min/1.73m <sup>2</sup> (n, column percent)                                | 2 (11%)             | 8 (13%)            | 0.52            | 3 (21%)            | 15 (14%)           | 0.33              |
| eGFR 30 to ≤ 60 ml/min/1.73m <sup>2</sup> (n, column percent)                          | 5 (28%)             | 8 (13%)            |                 | 4 (29%)            | 29 (26%)           |                   |
| eGFR < 30 ml/min/1.73m <sup>2</sup> (n, column percent) and not kidney failure         | 2 (11%)             | 11 (17%)           |                 | 3 (21%)            | 21 (19%)           |                   |
| Kidney failure <sup>c</sup> (dialysis or kidney transplanted)                          | 9 (50%)             | 37 (58%)           |                 | 4 (29%)            | 45 (41%)           |                   |
| Duration kidney failure to COVID or time of survey                                     | 14.24 ± 14.5 (11.5) | 17.1 ± 13.0 (17)   | 0.57            | 4.4 ± 4.9 (2.6)    | 10.8 ± 8.3 (10)    | 0.014             |
| Pre-kidney failure                                                                     | 10 (53%)            | 27 (42%)           | 0.30            | 10 (71%)           | 66 (60%)           | 0.44              |
| Duration kidney failure < 10 years                                                     | 4 (21%)             | 14 (22%)           |                 | 3 (21%)            | 21 (19%)           |                   |
| Duration kidney failure 10 to <15 years                                                | 2 (11%)             | 2 (3%)             |                 | 1 (7%)             | 11 (10%)           |                   |
| Duration kidney failure 15 to <20 years                                                | 0                   | 5 (8%)             |                 | 0                  | 6 (5%)             |                   |
| Duration kidney failure > 20 years                                                     | 3 (16%)             | 16 (25%)           | 0.040*          | 0                  | 7 (11%)            | 0.24 <sup>d</sup> |
| No vaccination (n (percent of those reporting vaccination status))                     | 3 (16%)             | 1 (2%)             |                 | 3 (21%)            | 12 (11%)           |                   |
| Partial vaccination (n (percent of those reporting vaccination                         | 1 (5%)              | 2 (3%)             |                 | 1 (7%)             | 0                  |                   |

|                                                                                        |          |          |      |          |          |      |
|----------------------------------------------------------------------------------------|----------|----------|------|----------|----------|------|
| status))                                                                               |          |          |      |          |          |      |
| Full vaccination (n (percent of those reporting vaccination status))                   | 15 (79%) | 59 (95%) |      | 10 (71%) | 95 (89%) |      |
| Full vaccination and 3 <sup>rd</sup> dose (n (percent of those with full vaccination)) | 5 (33%)  | 26 (44%) | 0.49 | 2 (20%)  | 40 (42%) | 0.18 |

<sup>a</sup>Percentages in the first row represent row percent. For other rows in the table, column percentages are given.

<sup>b</sup>Estimated glomerular filtration rate



Table 2. Characteristics ADTKD-*MUC1* and ADTKD-*UMOD* adults in registry

| Characteristic                                                   | ADTKD- <i>MUC1</i>      | ADTKD- <i>UMOD</i>       | <i>P</i> -value<br>Odd Ratio (OR)<br>given with 95%<br>Confidence<br>Interval (CI) where<br>applicable | <i>P</i> -value<br>grouping for<br>Kidney Failure<br>Modality<br>(No Kidney<br>Failure,<br>Dialysis,<br>Kidney<br>Transplant)<br>To consider a<br>change to the<br>table |
|------------------------------------------------------------------|-------------------------|--------------------------|--------------------------------------------------------------------------------------------------------|--------------------------------------------------------------------------------------------------------------------------------------------------------------------------|
| n                                                                | 360                     | 478                      |                                                                                                        |                                                                                                                                                                          |
| Gender (% male)                                                  | 41%                     | 45%                      | 0.19                                                                                                   |                                                                                                                                                                          |
| Age, y (mean ± s.d.<br>(median))                                 | 47.40 ± 15.8<br>(47.74) | 47.38 ± 14.89<br>(48.07) | 0.97                                                                                                   |                                                                                                                                                                          |
| Age > 60 (n,%)                                                   | 86 (24%)                | 118 (25%)                | 0.68                                                                                                   |                                                                                                                                                                          |
| Race (% White)                                                   | 86%                     | 95%                      |                                                                                                        |                                                                                                                                                                          |
| BMI                                                              | 26.22 ± 5.58<br>(25.5)  | 26.86 ± 5.75<br>(25.8)   | 0.47                                                                                                   |                                                                                                                                                                          |
| BMI greater than 25<br>n(%)                                      | 161 (55%)               | 211 (56%)                | 0.89                                                                                                   |                                                                                                                                                                          |
| On dialysis                                                      | 34 (9%)                 | 26 (5%)                  | 0.0027                                                                                                 | 0.0011                                                                                                                                                                   |
| Living with kidney<br>transplant                                 | 166 (46%)               | 164 (34%)                | 0.0037                                                                                                 |                                                                                                                                                                          |
| Not on dialysis or kidney<br>transplanted (n, column<br>percent) | 159 (44%)               | 287 (60%)                | <0.0001                                                                                                |                                                                                                                                                                          |
| Duration kidney failure <sup>a</sup><br>< 10 years               | 104 (29%)               | 110 (38%)                |                                                                                                        |                                                                                                                                                                          |
| Duration kidney failure<br>10 to ≤ 15 years                      | 25 (7%)                 | 33 (11%)                 |                                                                                                        |                                                                                                                                                                          |
| Duration kidney failure<br>15 to ≤ 20 years                      | 31 (9%)                 | 18 (6%)                  |                                                                                                        |                                                                                                                                                                          |
| Duration kidney failure<br>> 20 years                            | 41 (11%)                | 25 (9%)                  |                                                                                                        |                                                                                                                                                                          |

<sup>a</sup>Duration of kidney failure until the start of 2020

Table 3. Characteristics of individuals who died of COVID-19 related infection.

| Characteristic                                                              | ADTKD- <i>MUC1</i>       | ADTKD- <i>UMOD</i>        | <i>P</i> -value<br>Odd Ratio (OR) given<br>with 95% Confidence<br>Interval (CI) where<br>applicable |
|-----------------------------------------------------------------------------|--------------------------|---------------------------|-----------------------------------------------------------------------------------------------------|
| Individuals (n)                                                             | 19                       | 3                         |                                                                                                     |
| Gender (n male (%))                                                         | 11 (58%)                 | 2 (67%)                   | 0.89                                                                                                |
| Age, years (mean $\pm$ sd)                                                  | 56.49 $\pm$ 8.45 (57.62) | 71.44 $\pm$ 7.25 (74.80)  | 0.0002                                                                                              |
| Age > 60 years (n (%))                                                      | 7 (37%)                  | 3 (100%)                  | < 0.0001 <sup>b</sup>                                                                               |
| Body mass index,<br>kg/m <sup>2</sup> (mean $\pm$ sd)                       | 30.78 $\pm$ 6.46 (30.74) | 25.56 $\pm$ 2.02 (25.11)  | 0.02                                                                                                |
| Kidney transplanted (n<br>(%))                                              | 16 (84%)                 | 3 (100%)                  | 0.46 <sup>b</sup>                                                                                   |
| Pre-kidney failure (n<br>(%))                                               | 2 (11%)                  | 0                         | 0.01 <sup>b</sup>                                                                                   |
| No vaccination (n<br>(percent of those<br>reporting vaccination<br>status)) | 11/16 (69%)              | 1 (33%)                   | 0.23                                                                                                |
| Average length of<br>hospital stay (mean $\pm$<br>sd)                       | 18.67 $\pm$ 10.80 (21)   | 12 $\pm$ 5 (12)           | 0.15                                                                                                |
| Required mechanical<br>ventilation                                          | 18/18 (100%)             | 2 (67%)                   | 0.01 <sup>b</sup>                                                                                   |
| Years of kidney failure <sup>a</sup>                                        | 12.86 $\pm$ 10.84 (9)    | 21.93 $\pm$ 14.96 (13.76) | 0.45                                                                                                |
| >10 years kidney failure <sup>a</sup>                                       | 9/17 (53%)               | 3 (100%)                  | 0.003 <sup>b</sup>                                                                                  |

<sup>a</sup>Years of kidney failure are years from start of kidney failure until contracting COVID-19.

<sup>b</sup> *P*-values calculated using permutation test.

Table 4. Univariate and multivariate logistic regression models with death from COVID-19 as the outcome variable.

|                                      |             |                                 | Univariate        |         | Multivariate      |         |
|--------------------------------------|-------------|---------------------------------|-------------------|---------|-------------------|---------|
| Parameter                            | Reference   | Risk group                      | Odds Ratio        | P-value | Odds Ratio        | P-value |
| ADTKD                                | <i>UMOD</i> | <i>MUC1</i>                     | 8.54 (2.49-29.36) | 0.0007  | 8.38 (2.86-29.47) | 0.0009  |
| Body mass index (kg/m <sup>2</sup> ) |             | Increase by 1 kg/m <sup>2</sup> | 1.09 (1.03-1.15)  | 0.003   | 1.11 (1.04-1.18)  | 0.002   |
| Kidney Transplant Status             | No          | Yes                             | 9.66 (2.77-33.67) | 0.0003  | 5.49 (1.58-19.05) | 0.007   |
| Age (years)                          |             | Increase by 1 year              | 1.06 (1.03-1.08)  | <0.0001 | 1.04 (1.01-1.07)  | 0.003   |

Number of COVID-19 Deaths (n)

ADTKD-UMOD  
ADTKD-MUC1

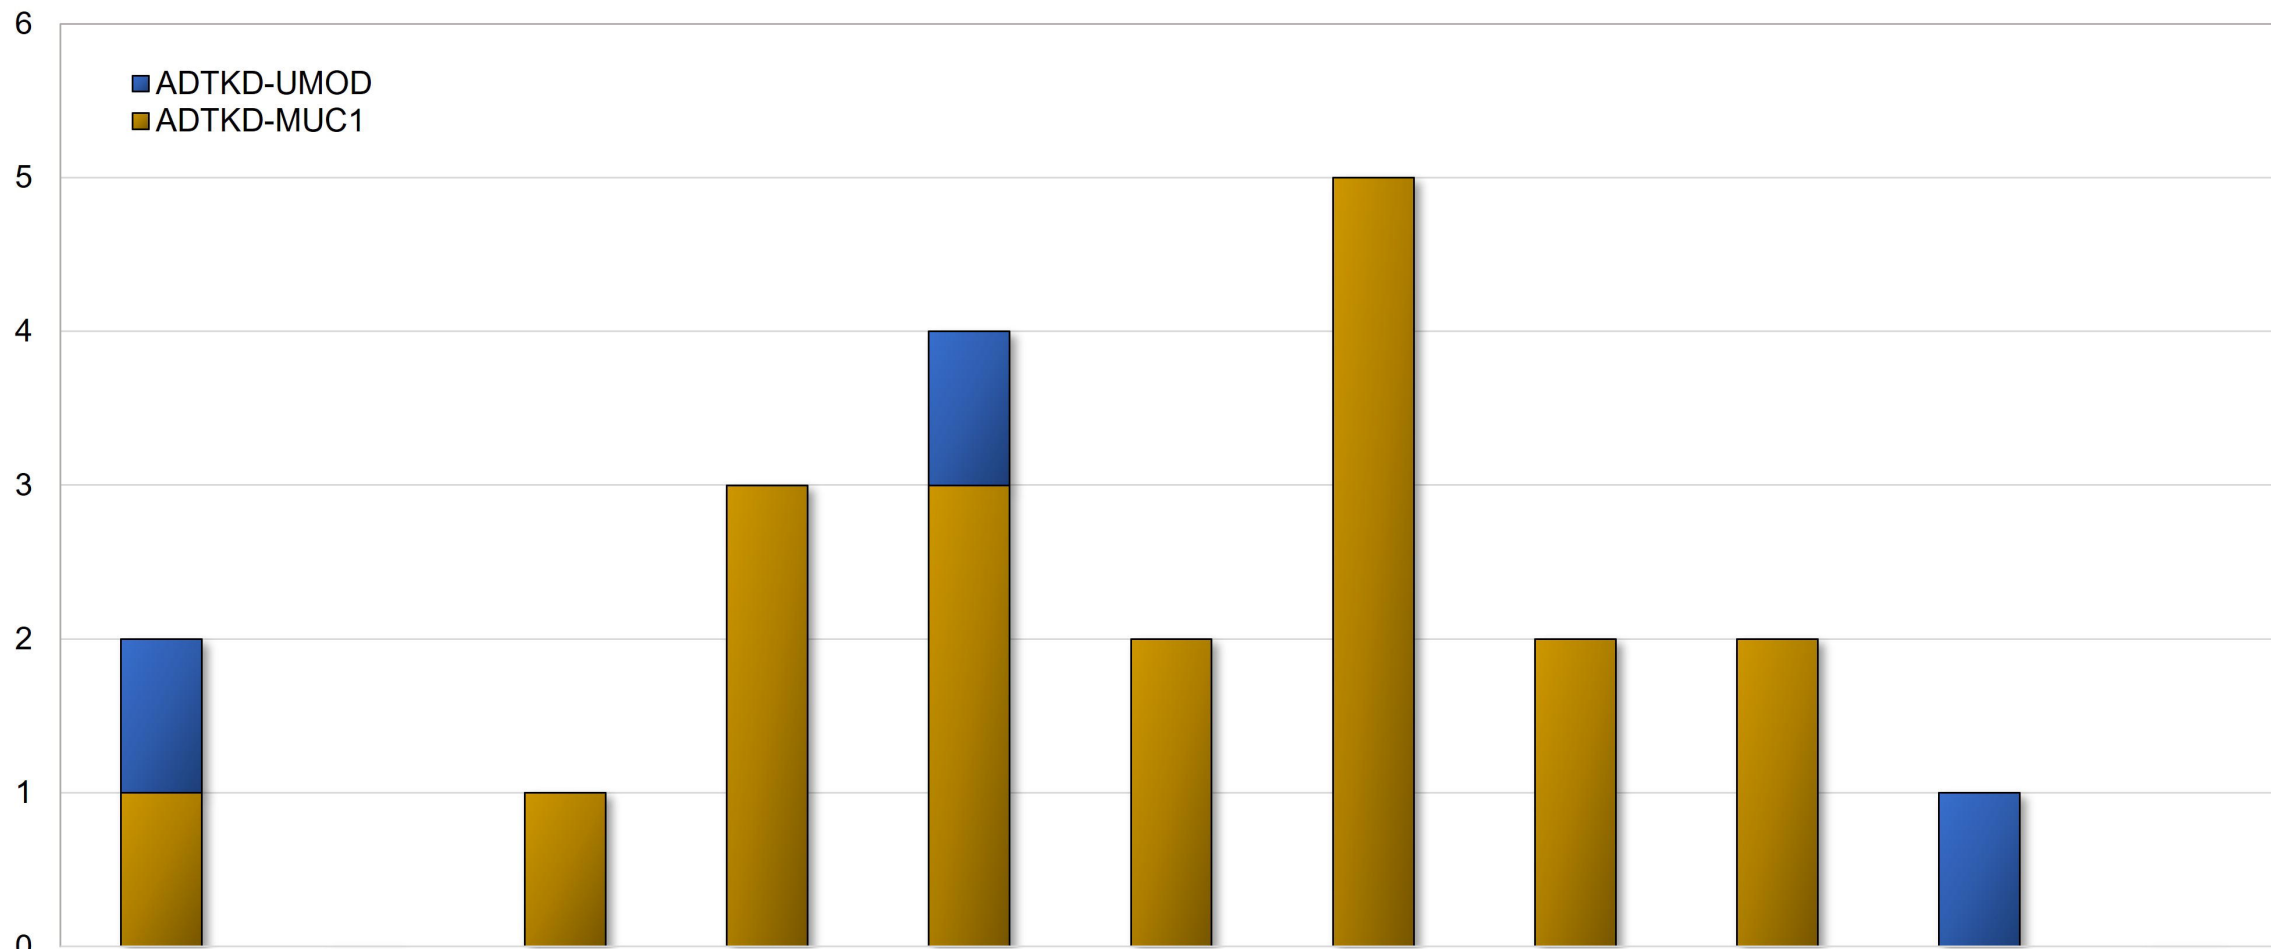

Jan 2020 -  
Apr 2020

May 2020 -  
Aug 2020

Sep 2020 -  
Dec 2020

Jan 2021 -  
Apr 2021

May 2021 -  
Aug 2021

Sep 2021 -  
Dec 2021

Jan 2022 -  
Apr 2022

May 2022 -  
Aug 2022

Sep 2022 -  
Dec 2022

Jan 2023 -  
Apr 2023

May 2023 -  
Aug 2023

Jan 2020  
1<sup>st</sup> US COVID-19  
Case Reported

Dec 2020  
Vaccinations for  
at-risk individuals

Mar 2021  
Delta Variant:  
1<sup>st</sup> US Case

Apr 2021  
Vaccinations  
available to all

Sep 2021  
COVID-19 Survey  
sent to ADTKD  
registry

Dec 2021  
Omicron Variant:  
1<sup>st</sup> US Case

Jan 2023  
Survey Inquiring about  
COVID-19 deaths sent  
to ADTKD registry  
participants

Aug 2023  
Systemic determination  
of COVID-19 deaths for  
ADTKD Registry  
Participants

**a****Initial ADTKD Registry COVID-19 Survey September 24, 2021- November 1, 2021**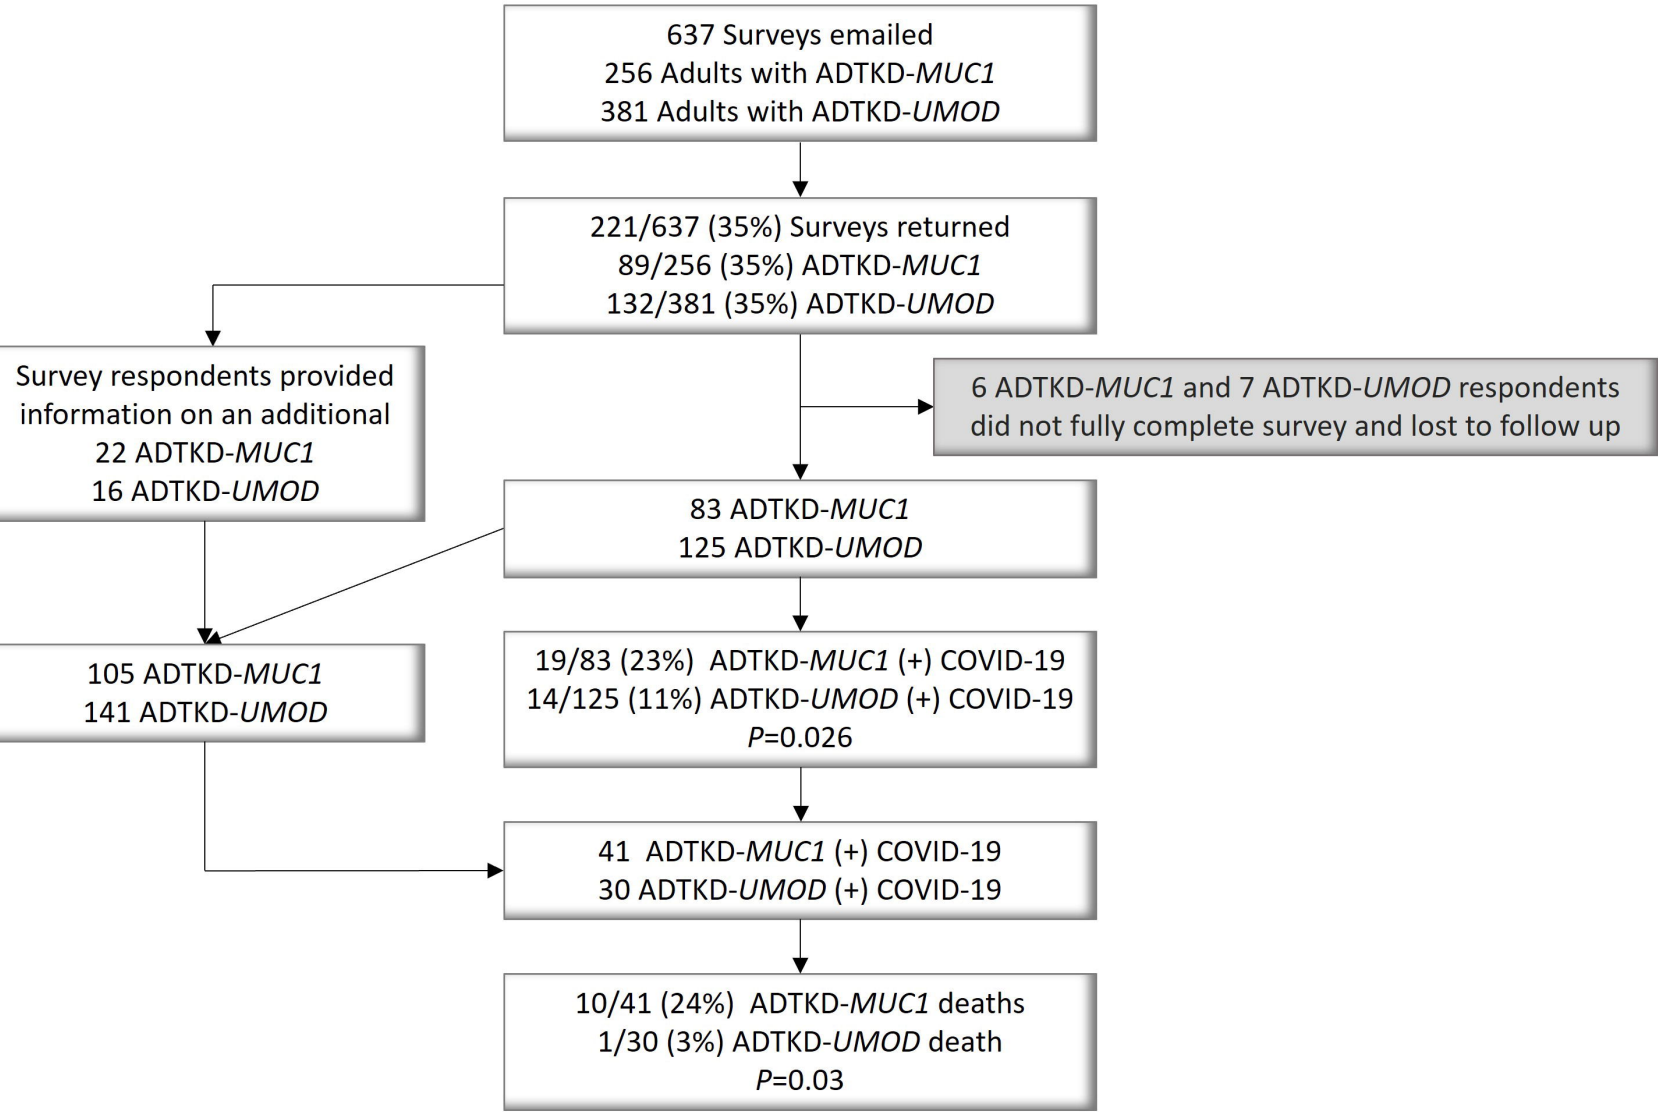**b****Cohort Study January 1, 2020 – August 8, 2023**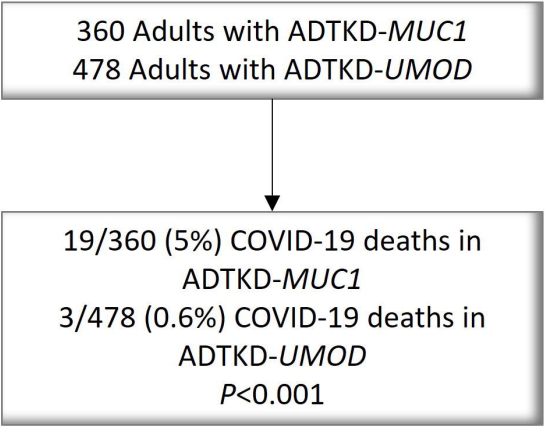

Source: https://medrxiv.org/content/10.1101/2024.07.03.24309887.full.pdf
